# Supplementary material for: Cobalt hexacyanoferrate supported on Sb-doped SnO2as a non-noble catalyst for oxygen evolution in acidic medium
Source: Royal Society of Chemistry journal article supplement (doi:10.1039/c7se00512a), 2017-12-18
Supplement: c7se00512a1.pdf [file c7se00512a1.pdf]

## Cobalt hexacyanoferrate supported on Sb-doped SnO<sub>2</sub> as a non-noble catalyst for oxygen evolution in acidic medium

### *Supporting information*

Bárbara Rodríguez-García<sup>a</sup>, Álvaro Reyes-Carmona<sup>a,b</sup>, Ignacio Jiménez-Morales<sup>b</sup>, Marta Blasco-Ahicart<sup>a</sup>, Sara Cavaliere<sup>b</sup>, Marc Dupont,<sup>b</sup> Deborah Jones<sup>b</sup>, Jacques Rozière,<sup>b</sup> José Ramón Galán-Mascarós<sup>a,c,†</sup> and Frédéric Jaouen<sup>b,†</sup>

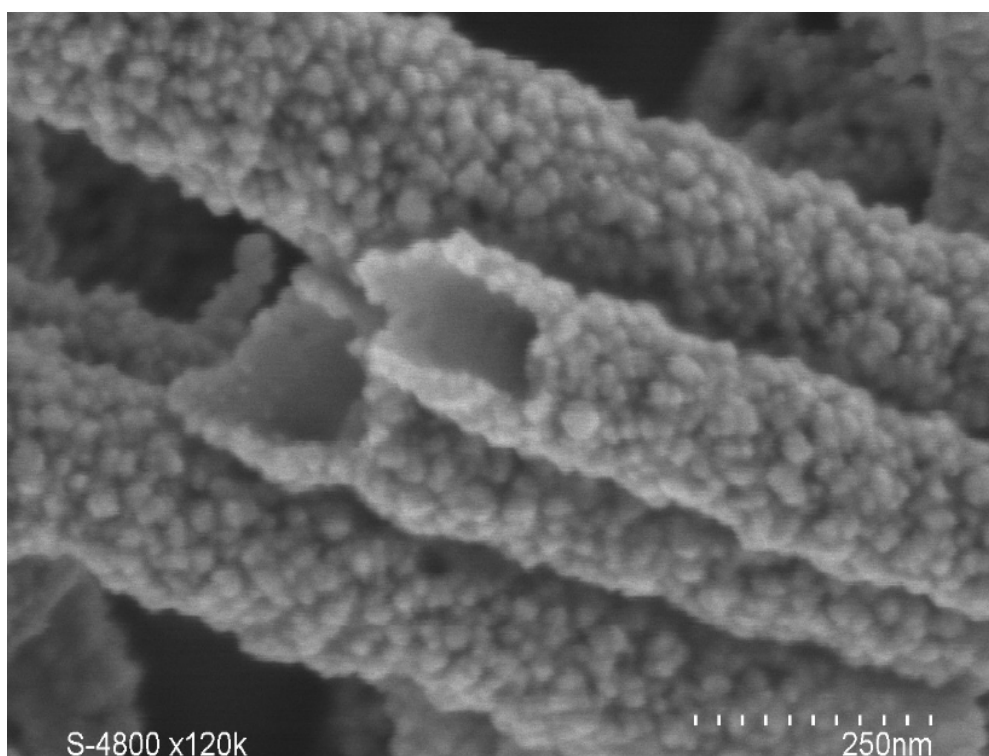

**Figure S1.** SEM image of ATO tubes with higher magnification

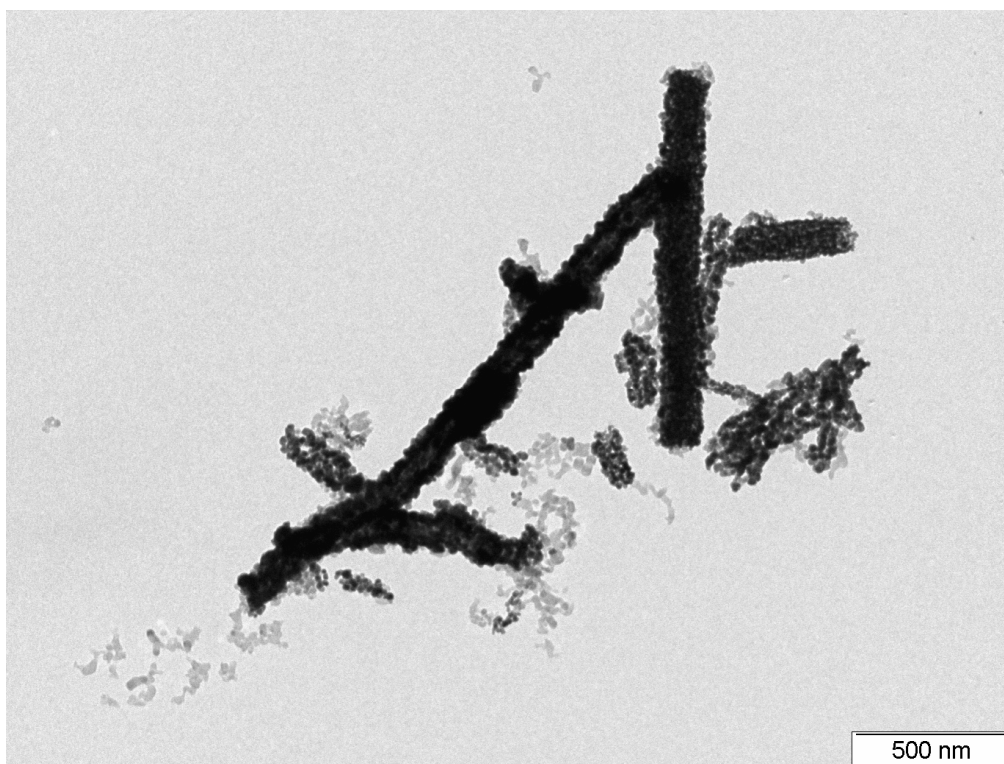

**Figure S2.** Lower-magnification TEM micrograph of ATO@17%CoHFe.

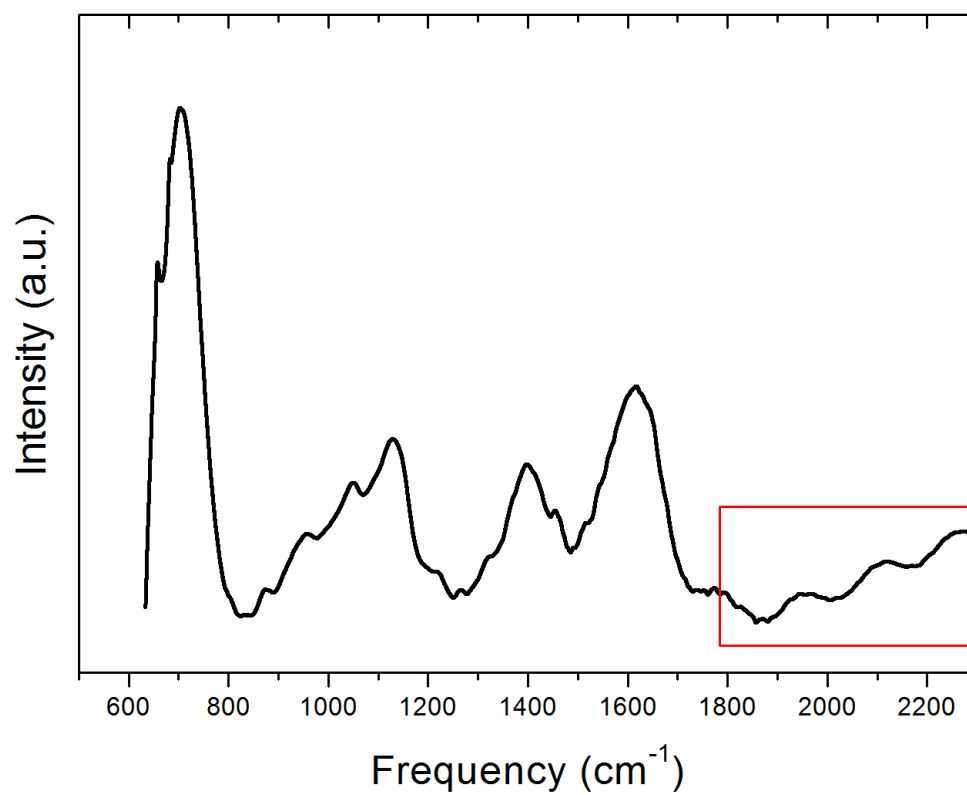

**Figure S3.** FT-IR spectrum of ATO. The red square shows the region used in Figure 2D where CoHFe displays intense peaks.

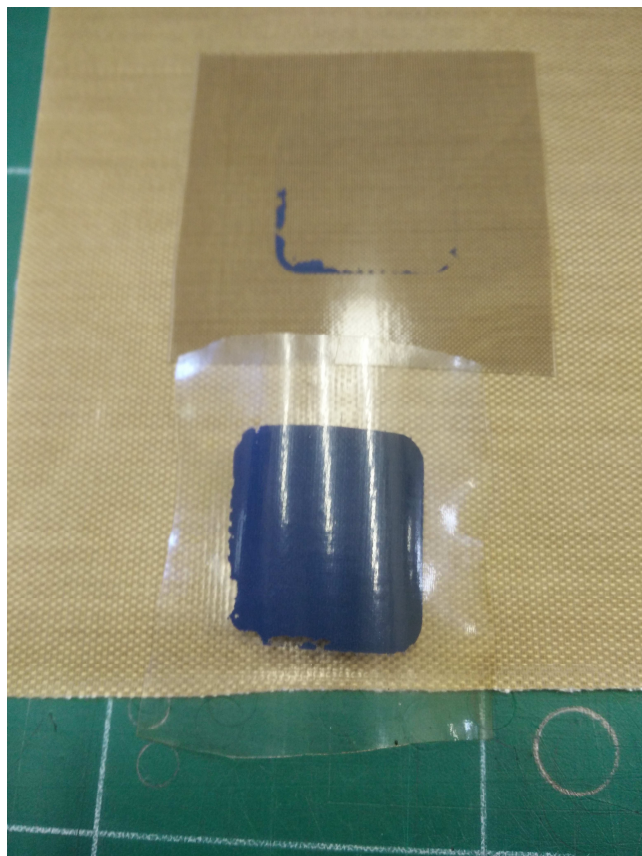

**Figure S4.** The catalyst ATO@17%CoHFe mixed with 20 wt % Nafion sprayed and transferred onto a Nafion 115 membrane at a catalyst loading of *ca* 3 mg cm<sup>-2</sup>.

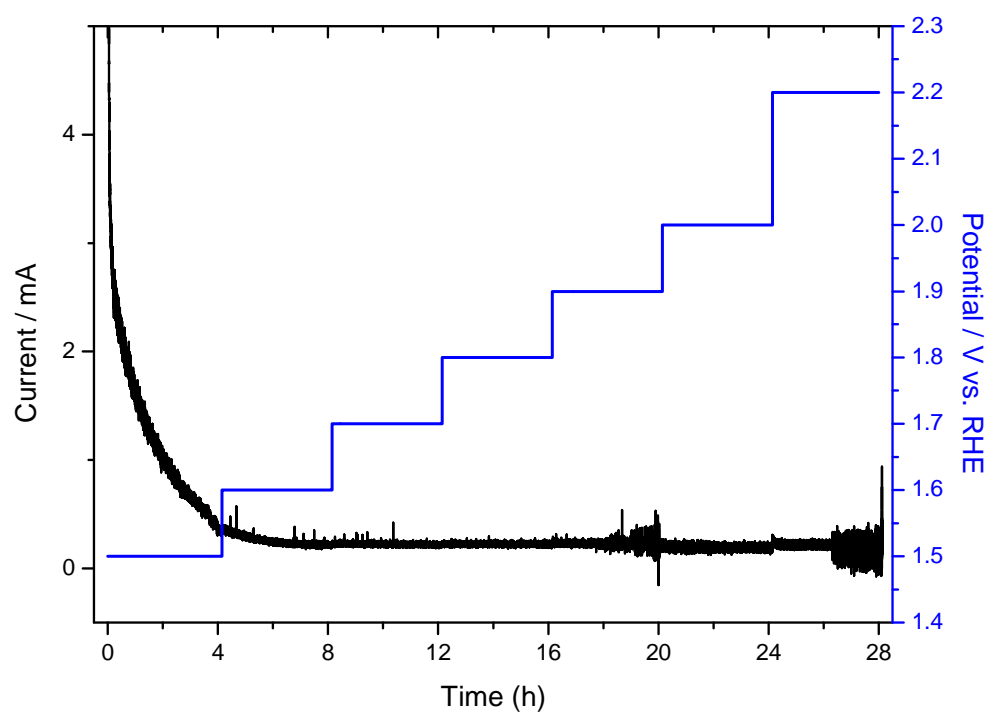

**Figure S5.** Oxidation current related to the anodic dissolution of ATO as a function of the electrochemical potential.
